1  
2  
3  
4  
5  
6  
7  
8  
9  
10  
11  
12  
13  
14  
15  
16  
17  
18  
19  
20  
21  
22  
23  
24  
25  
26  
27  
28

Ethological principles predict the neuropeptides co-opted to influence parenting.

Christopher B. Cunningham<sup>1</sup>, Majors J. Badgett<sup>2,3</sup>, Richard B. Meagher<sup>1</sup>, Ron Orlando<sup>3,4</sup>, Allen J. Moore<sup>1\*</sup>

<sup>1</sup>Department of Genetics  
120 Green St.  
Athens, GA 30602

<sup>2</sup>Department of Chemistry  
140 Cedar St.  
Athens, GA 30602

<sup>3</sup>Complex Carbohydrate Research Center  
315 Riverbend Rd.  
Athens, GA 30602

<sup>4</sup>Department of Biochemistry and Molecular Biology  
120 Green St.  
Athens, GA 30602

\*Corresponding author: Allen J. Moore: [ajmoore@uga.edu](mailto:ajmoore@uga.edu)

29 Abstract

30

31 Ethologists predicted that parental care evolves by modifying suitable behavioural precursors in  
32 the asocial ancestor, such as nest building, defensive and aggressive behaviours, and potentially  
33 shared resources. From this, we predicted that the evolved mechanistic changes would reside in  
34 genetic pathways underlying these behavioural precursors. We tested this by measuring  
35 differential expression of neuropeptides in female *Nicrophorus vespilloides*. Parenting in this  
36 species is extensive and complex as caring adults regurgitate food to begging, dependent  
37 offspring. We identified neuropeptides associated with mating, feeding, aggression, and social  
38 interactions by sampling females in different behavioural states: solitary, actively parenting, or  
39 post-parenting and solitary. We measured peptide abundance in adult female brains and  
40 identified 130 peptides belonging to 17 neuropeptides. Of these 17, seven were differentially  
41 expressed. Six of the seven were up-regulated during parenting. None of the identified  
42 neuropeptides have previously been associated with parental care, but all have known roles in the  
43 behavioural precursors. Two, tachykinin and sulfakinin, influence multiple pathways. Our study  
44 supports the prediction that appropriate behavioural precursors are likely targets of selection  
45 during the evolution of parenting. Evolutionary principles predicted neuropeptides influencing  
46 social behaviour, and our results provide several new candidate neuropeptides underpinning  
47 parenting.

48

49 Keywords: burying beetle, *Nicrophorus vespilloides*, parental care, proteomics, social behaviour,  
50 social evolution

51

52

53 The selective pressures that lead to the evolution of parental care are well documented. Parental  
54 care typically evolves to minimize unusually stressful or hazardous environments for offspring<sup>1-</sup>  
55 <sup>3</sup>. Although this hypothesis for the source of natural selection resulting in the evolution of  
56 parenting is widely supported<sup>3</sup>, parental care is not the only evolutionary solution to adverse  
57 conditions. Moreover, it may not be the most likely response as the evolution of parenting  
58 reflects changes in multiple behavioural inputs, involving many pathways<sup>4</sup>. At a minimum the  
59 evolutionary transition from asociality to subsociality involving direct parental care is predicted  
60 to require modification of the tendency to disperse from a mating site, a pause in reproduction  
61 and mating, defensive aggression to protect offspring and resources, changes in feeding  
62 behaviour, and a tolerance of increased social interactions<sup>1-3,5</sup>. Early ethological literature  
63 therefore predicts that parental care evolves only when there are suitable behavioural precursors  
64 present within the evolutionary ancestor, such as nest building, defensive postures and  
65 appropriately directed aggressive behaviours, and potentially shared resources<sup>1,2</sup>.

66  
67 Despite these early predictions of the specific behaviours to be modified, the mechanistic  
68 alterations involved are relatively unknown. However, the predictions of ethologists imply  
69 expected underlying genetic pathways. In addition, Wright's theory of nearly universal  
70 pleiotropy<sup>6</sup>, along with the ubiquity of regulatory evolutionary changes<sup>7-9</sup>, suggests that co-  
71 opting behaviours will result in altered gene expression rather than the evolution of novel genes.  
72 Identifying the nature of selection can be useful for predicting the genetic changes underlying the  
73 evolution of social behaviour generally<sup>5,10,11</sup>. Therefore, we predict that parenting will involve  
74 changes in gene expression influencing feeding, mating, aggression, and increased tolerance for  
75 social interactions as these are the behaviours modified as lineages evolve from asocial to  
76 subsocial<sup>1,2</sup>.

77  
78 Neuropeptides strongly influence the social behaviour of animals<sup>12</sup> and many  
79 neuropeptides are likely to be associated with parenting. One of the most studied neuropeptides,  
80 oxytocin, is necessary for parenting across the animal kingdom<sup>14</sup>. There is a casual relationship  
81 between the neuropeptide *galinin* and parental care in mice<sup>15</sup>. We have recently provided  
82 evidence that at the transcriptional level *neuropeptide F receptor* is differentially expressed  
83 between parenting and non-parenting states in the burying beetle *Nicrophorus vespilloides*<sup>16</sup>.  
84 Moreover, individuals expressing parental care must undergo many rapid shifts in behaviour.  
85 Neuropeptides can exhibit their influence within minutes, have highly localized effects targeting  
86 very select neural circuits, or have highly widespread effects targeting many and diffuse neural  
87 circuits<sup>16</sup>. However, transcriptomics is not a particularly powerful method for identifying  
88 changes in neuropeptide expression. Neuropeptides generally have low gene expression<sup>17</sup>, highly  
89 restricted sites of release<sup>16</sup>, and can be hard to detect with transcriptomic studies that are not  
90 highly tissue specific<sup>18</sup>. Proteomics can overcome some of these limitations and provides a  
91 method to target proteins of interest.

92

93           Here, we test the hypothesis that a transition from a non-parenting state to a parenting  
94 state will reflect differences in expression of neuropeptides known to be associated with mating,  
95 feeding, aggression, and increased tolerance of social interactions. To test this, we estimated the  
96 abundances of neuropeptides of the burying beetles *N. vespilloides* sampled from solitary, active  
97 parenting, or a post-parenting and solitary state. Burying beetles, especially *N. vespilloides*,  
98 represent an excellent system to address the role of neuropeptides in parenting. Parenting is  
99 extensive and elaborate (Fig. 1). Adult beetles of this genus locate a vertebrate carcass and bury  
100 it. Parents then provide indirect care by removing the fur or feathers and forming a nest within  
101 the carcass. They also repeatedly coat the carcass with excretions that retard microbial growth.  
102 Direct parental care involves feeding larvae predigested carrion by regurgitation for the first two  
103 days of larval life (Fig. 1). Parenting occurs for 75% of larval development, yet lasts only days<sup>19</sup>  
104 at which point larvae are fully-grown. *Nicrophorus vespilloides* is also molecularly tractable with  
105 a published genome<sup>20</sup>, allowing for efficient proteomic work and a characterization of the  
106 transcriptional response of a similar series of behavioural transitions. Finally, *N. vespilloides* is  
107 normally solitary but switches to parenting in the presence of suitable resources available (a  
108 vertebrate carcass) and restricted to a limited period of time. We can therefore sample females  
109 experimentally manipulated to be in non-overlapping behavioural states; from non-parenting and  
110 solitary, to parenting, or to post-parenting and solitary again<sup>19</sup>.  
111

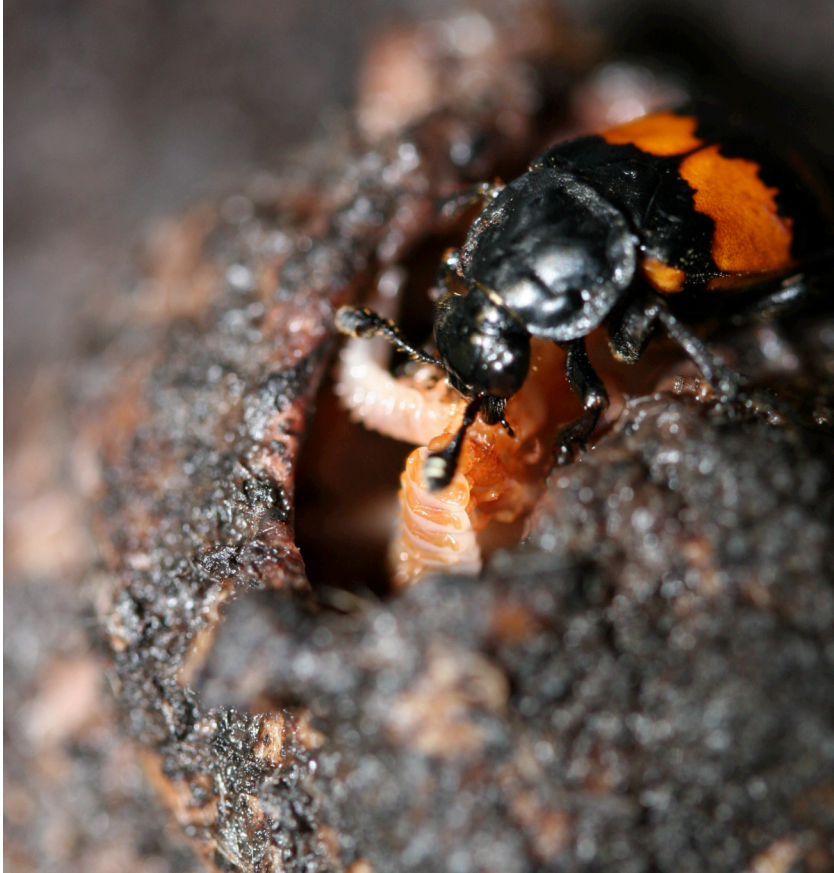

**Figure 1 | A female burying beetle feeding her begging, dependent offspring.** In this species, a parent spends around 72 h preparing a carcass, after which larvae hatch and arrive at the carcass. Once larvae arrive, parents spend a further 72 h feeding larvae (with peak parenting 12-24 h after larval arrival), and then disperse around 100 h. Larvae disperse fully grown around 125 h after arrival on the carcass. As shown here, feeding involves direct mouth-to-mouth contact and a transfer of pre-digested carrion from the parent to the offspring. Photograph by A. J. Moore.

112

## 113 Results

114

115 Our analysis identified 130 peptides in the brains of *N. vespilloides*. We found very few  
116 differences in the specific peptides that were identified for each neuropeptide proteins across the  
117 three behavioural states (i.e., peptides identified in one state but not others). Actively parenting  
118 individuals exclusively displayed two peptides from FMRFa: DKGHFLRF and  
119 GDLPANYEMEEGYDRPT. Actively parenting individuals exclusively displayed a single  
120 peptide from NPLP-1: KESYDDDYRMAAF. No *Apis*-NVP-like peptides of the sequence  
121 FLNGPTRNNYYTLSELLGAAQQEQNVPLYQRYVL were found in actively parenting  
122 samples.

123

124 From these peptides we identified 17 neuropeptide proteins that were present in at least  
125 one behavioural state (Table 1, 2). Twelve were represented in all three behavioural states, while  
126 PBAN was absent in post-parenting individuals, ITP was restricted to virgins, sNPF was  
127 restricted to virgins and actively parenting, DH<sub>47</sub> was restricted to actively parenting individuals,  
128 and CCAP was restricted to post-parenting individuals. Virgins showed a higher level of  
129 variability than the other two behavioural states.

130

131 Having defined these neuropeptides, we tested for changes in the relative abundances of  
132 all neuropeptides across the three behavioural states tested (virgins, actively parenting, and post-  
133 parenting individuals) using a multivariate analysis of variance (MANOVA). We found  
134 statistically significant overall differences in the relative abundance between the states ( $F_{2,9} =$   
135  $27.678$ ;  $P = 0.0001$ ) The main difference reflects level of expression in the different states (Fig.  
136 2, Table 2). We next used univariate comparisons (ANOVA's) to examine how the relative  
137 abundances of specific neuropeptides were changed. We found six neuropeptides were more  
138 highly expressed with actively parenting individuals. NPLP-1 was differentially expressed ( $F_{2,9}$   
139  $= 8.615$ ,  $P = 0.0081$ ), with statistically significantly higher expression of actively parenting  
140 compared with post-parenting ( $P = 0.0063$ ). TK was differentially expressed ( $F_{2,9} = 5.882$ ,  $P =$   
141  $0.023$ ), also with statistically significantly higher expression when individuals were actively  
142 parenting compared with post-parenting ( $P = 0.020$ ). FMRFa was differentially expressed ( $F_{2,9} =$   
143  $13.002$ ,  $P = 0.0022$ ), also with statistically significantly higher expression when individuals were  
144 actively parenting compared with virgins ( $P = 0.011$ ) and post-parenting ( $P = 0.0023$ ). SK was  
145 differentially expressed ( $F_{2,9} = 8.756$ ,  $P = 0.0077$ ), with statistically significantly higher  
146 expression in virgins ( $P = 0.026$ ) and actively parenting ( $P = 0.0087$ ) compared with post-  
147 parenting. PBAN was differentially expressed ( $F_{2,9} = 5.377$ ,  $P = 0.029$ ), with statistically  
148 significantly higher expression when individuals were actively parenting compared with post-  
149 parenting ( $P = 0.023$ ). NVP was differentially expressed ( $F_{2,9} = 4.210$ ,  $P = 0.051$ ), with higher  
150 expression when individuals were actively parenting compared with post-parenting ( $P = 0.043$ ).  
151 One neuropeptide, CCAP had statistically significantly lower expression in parenting individuals  
152 ( $F_{2,9} = 5.380$ ,  $P = 0.029$ ), with higher expression in post-parenting than in either virgins ( $P =$   
153  $0.046$ ) or actively parenting ( $P = 0.046$ ).

154

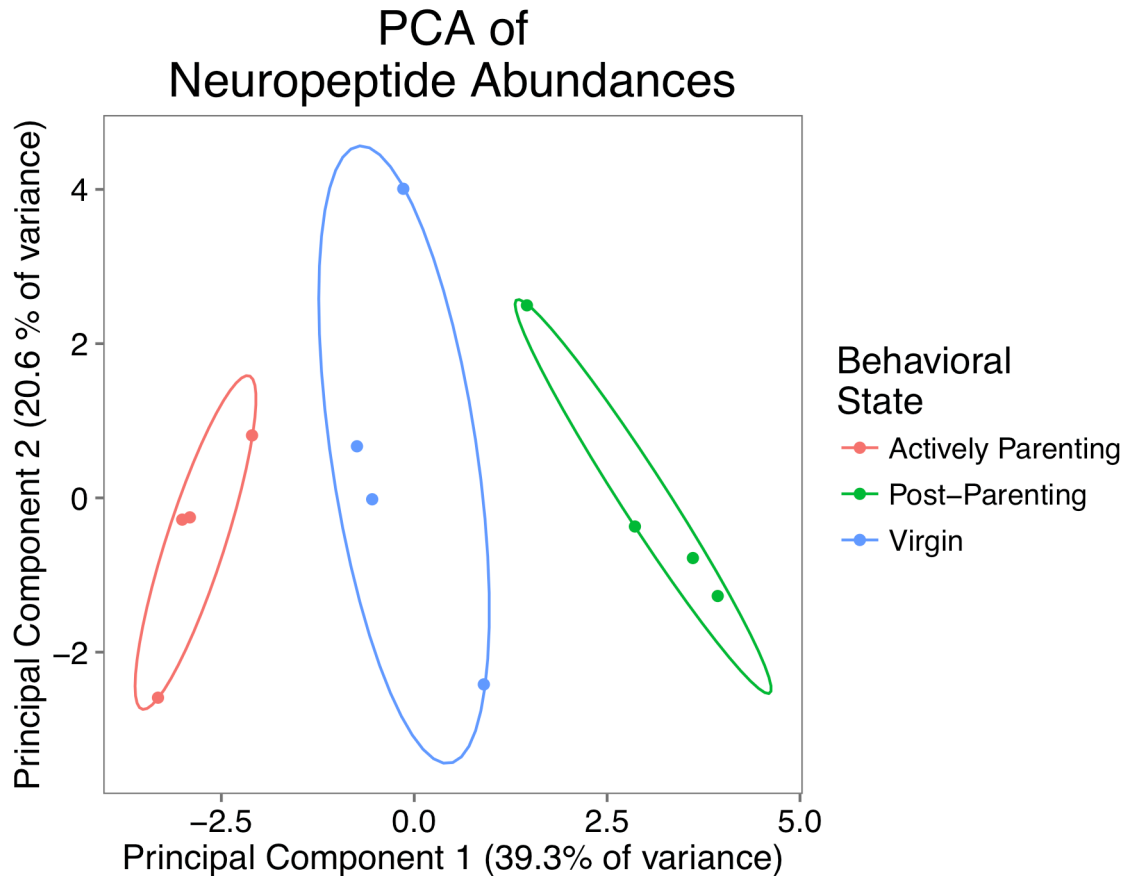

**Figure 2 | Principal component analysis (PCA) of all neuropeptide relative abundances.** Graph of the association between abundances and three non-parenting and parenting behavioural states of *Nicrophorus vespilloides*. Ellipses show the 95% confidence area of each group.

155

156

157 While not reaching the level of conventional statistical significance, we identified two

158 neuropeptides that showed a strong trend toward differential expression. RYa ( $F_{2,9} = 4.033$ ,  $P =$

159 0.056) and MYO ( $F_{2,9} = 3.611$ ,  $P = 0.071$ ) were also most highly expressed in actively parenting

160 individuals. The remaining neuropeptides showed no strong trends. There was no suggestion of

161 differential expression of DH<sub>31</sub> ( $F_{2,9} = 1.799$ ,  $P = 0.22$ ), ITG ( $F_{2,9} = 2.826$ ,  $P = 0.11$ ), SIFa ( $F_{2,9}$

162 = 0.297,  $P = 0.75$ ), IDL ( $F_{2,9} = 0.890$ ,  $P = 0.44$ ), MIP ( $F_{2,9} = 1.652$ ,  $P = 0.25$ ), ITP ( $F_{2,9} = 1.000$ ,

163  $P = 0.405$ ), sNPF ( $F_{2,9} = 2.074$ ,  $P = 0.18$ ), and DH<sub>47</sub> ( $F_{2,9} = 2.543$ ,  $P = 0.13$ ).

164

165

166

167 Our goal was to test the prediction that the mechanisms involved in the evolution of parental care

168 reside in predictable pathways reflecting co-opted behavioural precursors<sup>1,2</sup>. To do this we

169 examined peptide abundance, with the prediction that the neuropeptides differentially expressed

170 during parenting would function in feeding, mating, aggression, and social interactions in

organisms that do not display parental care. We profiled these changes from brains of the

171 burying beetle *Nicrophorus vespilloides*, which provides direct care by regurgitating food to  
172 dependent offspring. We identified 17 neuropeptides in the brain of *N. vespilloides*, which is  
173 consistent with other studies of non-model organisms<sup>21-23</sup>. Of these, seven were differentially  
174 expressed, with six up-regulated during parenting, in our comparison of the neuropeptides of  
175 individuals not parenting or post-parenting.

176  
177 Parenting across species typically involves a pause of mating, feeding others,  
178 appropriately directed aggression for defence, and social interactions<sup>1-3</sup>. The six neuropeptides  
179 that were differentially expressed (Table 1) support this prediction of these co-opted pathways.  
180 In other insects, both FMRFa and SK influence mating<sup>24,25</sup>. Feeding behaviour and food intake  
181 are influenced by NVP and SK<sup>22,26-28</sup>. Aggression and resource defence are influenced by TK<sup>29,30</sup>  
182 and SK<sup>25</sup>. NPLP-1, TK, and PBAN all influence tolerance of social interactions<sup>21,31,32</sup>. Of the 11  
183 neuropeptides that were not differentially expressed, many have poorly understood functions  
184 (e.g., ITG, RYa, MIP, MYO<sup>25,33,34</sup>), or function outside the predicted pathways (CCAP, DH<sub>31</sub>,  
185 DH<sub>47</sub>, IDL, ITP<sup>34</sup>). Two of these neuropeptides have the potential to function in the predicted  
186 pathways were sNPF, which influences feeding, and SIFa, which influences reproduction<sup>25,34,35</sup>.  
187 Critically, none of the differentially expressed neuropeptides we identified in this study function  
188 solely outside the predicted pathways. Thus, like candidate gene studies<sup>11</sup>, hypotheses about  
189 pathways are likely to be more robust than hypotheses focused on specific neuropeptides when  
190 examining homologous behaviour in novel species.

191  
192 Our study suggests three areas for further consideration to understand the mechanisms  
193 underlying parental care. First, we suggest that knowing the selective pressures leading to  
194 behavioural evolution provides insights into mechanisms by providing predicted pathways is  
195 general. This can be tested in other behaviours where the selective pressures are known and  
196 therefore the underlying behavioural traits that are predicted to change can be identified *a priori*.  
197 Second, we provide information about specific neuropeptides that appear to underpin parental  
198 care and these can be examined in other subsocial organisms. Functional studies are desperately  
199 needed for organisms outside the genetic model species. Finally, by specifying the behavioural  
200 and genetic pathways expected to be co-opted when parenting evolves, we can then identify  
201 particularly influential molecules that deserve further examination in *N. vespilloides*. Among  
202 those neuropeptides we have identified, both tachykinin and sulfakinin influence nearly all of the  
203 pathways thought to be co-opted during the evolution of parenting and deserve further  
204 investigation.

## 205 206 Methods

207  
208 Experimental Design. We used female *N. vespilloides* derived from an outbred colony we  
209 maintain at the University of Georgia, Athens. The colony was founded with beetles originally  
210 captured from Cornwall, UK and is subsidized yearly with new beetles from the same location.



211 Beetles were fed once weekly with decapitated mealworms *ab libitum* and kept on a 15:9 hour  
212 light:dark cycle. Further details of colony maintenance can be found in Cunningham et al.<sup>36</sup> with  
213 the exception of a change of soil type (to Happy Frog potting soil, FoxFarm, Arcata, CA, USA).  
214

215 To examine how neuropeptide expression changed with transitions of behavioural state,  
216 we collected age-matched females in three behavioural states: virgin (no social experience, no  
217 mating, no reproductive resource, and no parenting), actively parenting (social experience,  
218 mated, reproductive resource, and actively parenting), post-parenting (social experience, mated,  
219 reproductive resource, and past parenting experience). Full descriptions of each behavioural state  
220 can be found in Roy-Zokan et al.<sup>37</sup> We collected virgins directly from their individual housing  
221 boxes. We collected actively parenting females directly from the carcass cavity where offspring  
222 are fed. We collected post-parenting females nine days from the start of a breeding cycle after  
223 they had been isolated for 24 hours. We collected all beetles at 19-22 days post-adult eclosion  
224 and all beetles were fed one day before their collection or before their pairing to standardize  
225 feeding status.  
226

227 We performed dissections in ice-cold 1x PBS (National Diagnostics, Atlanta, GA, USA)  
228 and completed them within four minutes. We placed single brains into 0.6 mL Eppendorf tubes  
229 with 30  $\mu$ L of ice-cold acidified acetone extraction buffer (40:6:1 (v/v/v) Acetone: H<sub>2</sub>O:  
230 Concentrated HCl). We did not collect the retro-cerebral complex (corpora allata-corpora  
231 cardiaca). Once collected, we stored samples at -80 °C until extraction.  
232

233 We pooled eight brains into a single biological replicates by removing brains and their  
234 associated acetone extraction buffer to a single 2.0 mL low protein binding Sartorius Vivacon  
235 500 tubes (Göttingen, Germany). We collected four biological replicates per behavioural state.  
236 We sonicated each biological replicate with a Misonix Sonicator S-4000 (Farmingdale, NY,  
237 USA) fitted with a 1/8" tip (#419) set to an amplitude of 20 for a total of 60s sonication with 15s  
238 pulses followed by 15s rest on ice. We then centrifuged replicates at 16,000 g for 20 minutes at 4  
239 °C with a 5810-R Eppendorf centrifuge. We collected the supernatant into a new Vivacon tube  
240 and repeated the extraction with the same volume of buffer and sonication protocol. We pooled  
241 and extracted all replicates at the same time without ordering. We stored samples at 4 °C until  
242 LC-MS/MS analysis.  
243

244 We analysed our biological replicates with a Finnigan LTQ linear ion trap mass  
245 spectrometer (Thermo-Fisher) and an 1100 Series Capillary LC system (Agilent Technologies)  
246 with an ESI source with spray tips built in-house. The extraction buffer was vacuum-dried off of  
247 all biological replicates with a VirTis Benchtop K Lyophilizer (SP Scientific, Warminster, PA,  
248 USA) and biological replicates were suspended in 11  $\mu$ L of buffer A [5% acetonitrile/0.1%  
249 formic acid/10 mM ammonium formate] and 8  $\mu$ L of each replicate were injected into the LC  
250 column. Peptides were separated using a 200- $\mu$ m x 150-mm HALO Peptide ES-C18 column

251 packed with 5- $\mu$ m diameter superficially porous particles (Advanced Materials Technology). The  
252 gradient used for each replicate was 5-75% buffer B (80% acetonitrile/0.1% formic acid/10 mM  
253 ammonium formate) for 120 minutes at a 2  $\mu$ L/min flow rate. The settings for the mass  
254 spectrometer included taking the 5 most intense ions from each full mass spectrum for  
255 fragmentation using collision-induced dissociation (CID) and the resulting MS/MS spectra were  
256 recorded. Our biological replicates from the three treatments were interspersed with each other  
257 for LC-MS/MS analysis. All chemicals were LC-MS or molecular biology grade.

258  
259 Neuropeptide Identification and Analysis. We converted the resulting RAW spectra using Trans  
260 Proteomic Pipeline (Seattle Proteome Center, Seattle, WA, USA). MS/MS spectra were then  
261 imported into MASCOT (v2.2.2; MatrixScience, Boston, MA, USA) and searched against all  
262 annotated proteins from the *N. vespilloides* genome<sup>20</sup>. We set search parameters as: enzyme,  
263 none; fixed modifications, none; variable modifications as oxidation (M), acetyl (N-terminus),  
264 pyroglutamic acid (N-terminus Glutamine), and amidation (C-terminus); maximum post-  
265 translational modifications, 6; peptide mass tolerance,  $\pm$  1000 ppm; fragment mass tolerance,  $\pm$   
266 0.6 Da.

267  
268 We imported MASCOT results into ProteoIQ (v2.6.03; Premier Biosoft, Palo Alto, CA,  
269 USA) to estimate abundance of neuropeptides. We identified proteins, peptides, and assigned  
270 spectral counts using all biological replicates for each behavioural state. This analysis produces a  
271 list of peptides assigned to each identified protein and from this we looked for qualitative  
272 differences in the presence/absence of peptides across the behavioural states for peptides that had  
273 at least three spectra and were not truncated forms of a larger observed peptide from a particular  
274 protein. We excluded peptides from proteins that were only observed in a single behavioural  
275 state. We then calculated normalized spectral abundance factor (NASF's) for all proteins within  
276 each biological replicate using the protein length for the NASF length correction factor<sup>38</sup>. Only  
277 peptides with at least two spectra within one biological replicate were quantified. Neuropeptide  
278 proteins were extracted from the overall protein list after establishing their identity within the  
279 published *N. vespilloides* gene set with a *Tribolium castaneum* neuropeptidome<sup>39</sup> and confirming  
280 their identity using NCBI's non-redundant insect protein database.

281  
282 To test the hypothesis that changes in neuropeptide expression can be predicted *a priori*,  
283 we first performed a MANOVA to establish that there was an overall difference in the  
284 neuropeptide composition between treatments. We followed this multivariate test with univariate  
285 tests (ANOVAs) for difference of individual neuropeptide abundance, testing for the effect of  
286 behavioural state on expression. We performed *post-hoc* tests of differences in the pairwise  
287 means of the behavioural states using Tukey-Kramer HSD tests. All statistical analyses were  
288 conducted with JMP Pro (v11.0.0, Cary, NC, USA). Visualizations were prepared in R (v3.2.1)  
289 using `prcomp` function and `ggbiplot` ([github.com/vqv/ggbiplot](https://github.com/vqv/ggbiplot)).

290

291

292 References

293

294 1. Tallamy, D. W. Insect parental care. *Biosci.* **34**, 20-24 (1984).

295

296 2. Tallamy, D. W. & Wood, T. K. Convergence patterns in subsocial insects. *Ann. Rev.*  
297 *Entomol.* **31**, 369-390 (1986).

298

299 3. Smiseth, P. T., Kölliker, M. & Royle, N. J. 2014. What is parental care? *The Evolution of*  
300 *Parental Care* (eds Royle, N. J., Smiseth, P. T. & Kölliker, M.). p 1-14. (Oxford University  
301 Press, 2014).

302

303 4. Székely, T., Remeš, V., Freckleton, R. P. & Liker, A. Why care? Inferring the evolution of  
304 complex social behaviour. *J. Evol. Biol.* **26**, 1381-1391 (2013).

305

306 5. Fischer, E. K. & O'Connell, L. A. Modifications of feeding circuits in the evolution of  
307 social behavior. *J. Exp. Biol.*, *in press* (2016).

308

309 6. Wright, S. *Evolution and the Genetics of Populations Volume 1: Genetic and Biometric*  
310 *Foundations*. (University of Chicago Press, Chicago, 1968).

311

312 7. Linksvayer, T. A. & Wade, M. J. The evolutionary origin and elaboration of sociality in the  
313 aculeate Hymenoptera: maternal effects, sib-social effects and heterochrony. *Quart. Rev.*  
314 *Biol.* **80**, 317-336 (2005).

315

316 8. Wray, G. The evolutionary significance of cis-regulatory changes. *Nature Rev. Gene.* **8**,  
317 206-216 (2007).

318

319 9. Albert, F. W. & Krugliak, L. The role of regulatory variation in complex traits and disease.  
320 *Nature Rev. Gene.* **16**, 197-212 (2015).

321

322 10. Mikheyev, A. S. & Linksvayer, T. A. Genes associated with ant social behavior show  
323 distinct transcriptional and evolutionary patterns. *eLife* **4**, e04775 (2015).

324

325 11. Linksvayer, T. A. & Wade, M. J. Theoretical predictions for sociogenomic data: the effects  
326 of kin selection and sex-limited expression on the evolution of social insect genomes.  
327 *Front. Ecol. Evol.* **4**, 65 (2016). doi: 10.3389/fevo.2016.00065

328

329 12. Insel, T. R. The challenge of translation in social neuroscience: a review of oxytocin,  
330 vasopressin, and affiliative behavior. *Neuron* **65**, 768-779 (2010).

331

332 13. Dulac, C., O'Connell, L.A. & Wu, Z. Neural control of maternal and paternal behavior.  
333 *Science* **345**, 765-770 (2014).

334

335 14. Wu, Z., Autry, A. E., Bergan, J. F., Watabe-Uchida, M. & Dulac, C. G. Galanin neurons in  
336 the medial preoptic area govern parental behaviour. *Nature* **509**, 325-330 (2014).

- 337  
338 15. Cunningham, C. B., VanDenHeuvel, K., Khana, D. B., McKinney, E. C. & Moore, A. J.  
339 The role of *neuropeptide F* in a transition to parental care. *Biol. Lett.* **12**, 20160158 (2016).  
340  
341 16. Nässel, D. R. Neuropeptide signaling near and far: how localized and timed is the action of  
342 neuropeptides in brain circuits? *Invert. Neurosci.* **9**, 57-75 (2009).  
343  
344 17. Wheeler, M. M., Ament, S. A., Rodriguez-Zas, S. L., Southey, B. & Robinson, G. E. Diet  
345 and endocrine effects on behavioral maturation-related gene expression in the pars  
346 intercerebralis of the honey bee brain. *J. Exp. Biol.* **218**, 4005-4014 (2015).  
347  
348 18. Valcu, C.-M. & Kempenaers, B. Proteomics in behavioral ecology. *Behav. Ecol.* **26**, 1-15  
349 (2014).  
350  
351 19. Parker, D. J., et al. Transcriptomes of parents identify parenting strategies and sexual  
352 conflict in a subsocial beetle. *Nature Comm.* **6**, 8449 (2015).  
353  
354 20. Cunningham, C. B., et al. The genome and methylome of a beetle with complex social  
355 behavior, *Nicrophorus vespilloides* (Coleoptera: Silphidae). *Genome Biol. Evol.* **7**, 3383-  
356 3396 (2015).  
357  
358 21. Brockman, A., et al. Quantitative peptidomics reveal brain peptide signatures of behavior.  
359 *Proc. Nat. Acad. Sci. USA* **106**, 2383-2388 (2009).  
360  
361 22. Sterkel, M., Urlaub, H., Rivera-Pomar, R. & Ons, S. Functional proteomics of  
362 neuropeptidome dynamics during the feeding process of *Rhodnius prolixus*. *J. Proteome*  
363 *Res.* **10**, 3363-3371 (2011).  
364  
365 23. Schmitt, F., et al. Neuropeptidomics of the carpenter ant *Camponotus floridanus*. *J.*  
366 *Proteome Res.* **14**, 1504-1514 (2015).  
367  
368 24. Liu, T., Kim, K., Li, C. & Barr, M. M. FMRFamide-like neuropeptides and  
369 mechanosensory touch receptor neurons regulate male sexual turning behavior in  
370 *Caenorhabditis elegans*. *J. Neurosci.* **27**, 7174-7182 (2007).  
371  
372 25. Nässel, D. R. & Winther, A. M. E. *Drosophila* neuropeptides in regulation of physiology  
373 and behavior. *Prog. Neurobiol.* **92**, 42-104 (2010).  
374  
375 26. Marciniak, P., Kuczer, M. & Rosinski, G. New physiological activities of myosuppressin,  
376 sulfikinin and NVP-like peptide in *Zophobas atratus* beetle. *J. Compar. Physiol. B* **181**,  
377 7210-730 (2011).  
378  
379 27. Nässel, D. R. & Williams, M. J. Cholecystokinin-like peptide (DSK) in *Drosophila*, not  
380 only for satiety signaling. *Front. Endocrin.* **5**, 219 (2014). doi: 10.3389/fendo.2014.00219.  
381

- 382 28. Lin, X., Na, Y. & Smagghe, G. Insulin receptor regulates food intake through sulfakinin  
383 signaling in the red flour beetle, *Tribolium castaneum*. *Peptides* **80**, 89-95 (2016).  
384
- 385 29. Asahina, K., et al. Tachykinin-expressing neurons control male-specific aggressive arousal  
386 in *Drosophila*. *Cell* **156**, 221-235 (2014).  
387
- 388 30. Howe, J., Schott, M. & Boomsma, J. J. Tachykinin expression levels correlate with caste-  
389 specific aggression in workers of the leaf-cutting ant *Acromyrmex eximinator*. *Front. Ecol.*  
390 *Evol.* **4**, 55 (2016). doi: 10.3389/fevo.2016.00055.  
391
- 392 31. Rafaeli, A. Pheromone biosynthesis activating neuropeptide (PBAN): Regulatory role and  
393 mode of action. *Gen. Comp. Endocrin.* **162**, 69-78 (2009).  
394
- 395 32. Han, B., et al. Quantitative neuropeptidome analysis reveals neuropeptides are correlated  
396 with social behavior regulation of honeybee workers. *J. Proteome Res.* **14**, 4382-4393  
397 (2015).  
398
- 399 33. Roller, L., Čižmár, D., Bednár B. & Žitňan, C. Expression of RYamide in the nervous and  
400 endocrine system of *Bombyx mori*. *Peptides* **80**, 72-79 (2016).  
401
- 402 34. Strand, M. R., Brown, M. R. & Vogel, K. J. Mosquito peptide hormones: diversity,  
403 production, and function. *Adv. Insect Physiol.*, in press (2016). doi:  
404 10.1016/bs.aiep.2016.05.003.  
405
- 406 35. Sellami, A. & Veenstra, J. A. SIFamide acts on fruitless neurons to modulate sexual  
407 behavior in *Drosophila melanogaster*. *Peptides* **74**, 50-56 (2015).  
408
- 409 36. Cunningham, C. B., Douthit, M. K. & Moore, A. J. Octopamine gene expression and  
410 flexible social behaviour in the subsocial burying beetle *Nicrophorus vespilloides*. *Insect*  
411 *Mol. Biol.* **23**, 391-404 (2014).  
412
- 413 37. Roy-Zokan, E. M., Cunningham, C. B., Hebb, L. E., McKinney, E. C. & Moore, A. J.  
414 Vitellogenin and vitellogenin receptor gene expression is associated with male and female  
415 parenting in a subsocial insect. *Proc. Roy. Soc. B: Biol. Sci.* **282**, 20150787 (2015). doi:  
416 10.1098/rspb.2015.0787  
417
- 418 38. Neilson, K. A., Keighley, T., Pascovici, D., Cooke, B. & Haynes, P. A. Label-free  
419 quantitative shotgun proteomics using normalized spectral abundance factors. *Proteomics*  
420 *for Biomarker Discovery: Methods and Protocols* (eds Zhou, M. & Veenstra, T.). p 205-  
421 222. (Springer Publishing Company, 2013).  
422
- 423 39. Li, B., et al. Genomics, transcriptomics, and peptidomics of neuropeptides and protein  
424 hormones in the red flour beetle *Tribolium castaneum*. *Genome Res.* **18**, 113-122 (2008).  
425  
426  
427

428

429 Acknowledgements. We thank Elizabeth McKinney for technical support. This research was  
430 supported by funding to AJM from the US National Science Foundation (IOS-1354358) and the  
431 University of Georgia's Office of the Vice-President for Research.

432

433 Author Contributions. CBC, RBM, RO, AJM designed the experiment. CBC gathered and  
434 extracted the biological samples with assistance from RBM. MJB and RO conducted the LC-  
435 MS/MS analysis. CBC and AJM analysed results with guidance from MJB and RO. CBC and  
436 AJM wrote the manuscript with input from all authors. All authors approved the final  
437 manuscript.

438

439 Conflict of Interest. We declare no conflict of interest.

440

441

442

443

Table 1. Individual peptides of the neuropeptide precursors identified with observed modifications and evidence of differential expression. Both functional and non-functional peptides are reported.

| Peptide                                                                        | Possible Modifications Observed                         | Differential Expression                                |
|--------------------------------------------------------------------------------|---------------------------------------------------------|--------------------------------------------------------|
| <u><i>Apis</i>-ITG-like (ITG)</u>                                              |                                                         |                                                        |
| AGEKRLTGLAAFKRPMH                                                              | N-terminus Acetylation; Oxidation; C-terminus Amidation | $F_{2,9} = 2.826, P = 0.11$                            |
| ALLAICLLGRQTEAWGGL                                                             | N-terminus Acetylation                                  |                                                        |
| ANMGYG                                                                         | N-terminus Acetylation                                  |                                                        |
| LTGLAAFKRPM                                                                    | Oxidation                                               |                                                        |
| TCLFAYGRRVGELCRRDSDCESGLVC                                                     | C-terminus Amidation                                    |                                                        |
| VCTESEQTSSSRICR                                                                |                                                         |                                                        |
| <u><i>Apis</i>-NVP-like (NVP)</u>                                              |                                                         |                                                        |
| APVNAESHGESRPT                                                                 |                                                         | ↑ - Actively Parenting<br>$F_{2,9} = 4.210, P = 0.051$ |
| APVNAESHGESRPTA                                                                |                                                         |                                                        |
| APVNAESHGESRPTAV                                                               | C-terminus Amidation                                    |                                                        |
| FAALALALPASVVEDVKSSDIKNSKVCRAP                                                 | C-terminus Amidation                                    |                                                        |
| FLNGPTRNNYYTSELLGAAQQEQNVPLYQRYVL                                              | C-terminus Amidation                                    |                                                        |
| LPASVVEDVKSSD                                                                  | C-terminus Amidation                                    |                                                        |
| LPASVVEDVKSSDIKN                                                               |                                                         |                                                        |
| LPASVVEDVKSSDIKNS                                                              | C-terminus Amidation                                    |                                                        |
| LPASVVEDVKSSDIKNSKV                                                            | C-terminus Amidation                                    |                                                        |
| LPASVVEDVKSSDIKNSKVCRAPVN                                                      | C-terminus Amidation                                    |                                                        |
| NAQKTRMDNRYKREVD                                                               | N-terminus Acetylation; C-terminus Amidation            |                                                        |
| PLYTSEDE                                                                       | N-terminus Acetylation                                  |                                                        |
| PTRNNYYTSELLGAAQQEQNVPLYQRYVL                                                  |                                                         |                                                        |
| SNDPTREI                                                                       |                                                         |                                                        |
| SPLYTSEDELGNDKT                                                                | N-terminus Acetylation; C-terminus Amidation            |                                                        |
| <u>Crustean Cardioactive Peptide (CCAP)</u>                                    |                                                         |                                                        |
| ANGYEGRDSIIDPK                                                                 |                                                         | ↑ - Post-Parenting<br>$F_{2,9} = 5.380, P = 0.029$     |
| FAFLVIDTESIFLPKRANGYE                                                          | C-terminus Amidation                                    |                                                        |
| FAFLVIDTESIFLPKRANGYEGRDSIIDP                                                  | C-terminus Amidation                                    |                                                        |
| SMQGDND                                                                        | Oxidation                                               |                                                        |
| <u>Diuretic Hormone 31 (DH<sub>31</sub>) / Calcitonin</u>                      |                                                         |                                                        |
| APHNSRYMGYYGSNQDGQNPEYLLQTLARIRQAIIEEDLENS                                     |                                                         | $F_{2,9} = 1.799, P = 0.22$                            |
| GLDLGLGRGFSGSQAA                                                               |                                                         |                                                        |
| GLDLGLGRGFSGSQAACH                                                             |                                                         |                                                        |
| GLDLGLGRGFSGSQAACHLM                                                           | C-terminus Amidation                                    |                                                        |
| GLDLGLGRGFSGSQAACHLMGLAAANFAGGP                                                | C-terminus Amidation                                    |                                                        |
| GLDLGLGRGFSGSQAACHLMGLAAANFAGGP                                                | Oxidation; C-terminus Amidation                         |                                                        |
| GLDLGLGRGFSGSQAACHLMGLAAANFAGGPG                                               | C-terminus Amidation                                    |                                                        |
| LDLGLGRGFSGSQAACHLMGLAAANFAGGP                                                 | N-terminus Acetylation; Oxidation; C-terminus Amidation |                                                        |
|                                                                                |                                                         |                                                        |
| <u>Diuretic Hormone 47 (DH<sub>47</sub>) / Corticotrophin Releasing Factor</u> |                                                         |                                                        |
| EENPLFGRENEPMDREAMGYILPKLMPRY                                                  | C-terminus Amidation                                    | $F_{2,9} = 2.543, P = 0.13$                            |

Table 1. Continued

|                                     |                                     |                                                         |                                                          |
|-------------------------------------|-------------------------------------|---------------------------------------------------------|----------------------------------------------------------|
| <u>FMRamide (FMRFa)</u>             |                                     |                                                         | ↑ - Actively Parenting<br>$F_{2,9} = 13.002, P = 0.0022$ |
|                                     | DKGHFLRF                            | C-terminus Amidation                                    |                                                          |
|                                     | GDLPANYEMEEGYDRPT                   | C-terminus Amidation                                    |                                                          |
|                                     | GNSDFLRF                            | C-terminus Amidation                                    |                                                          |
|                                     | NDNFMRF                             | C-terminus Amidation                                    |                                                          |
|                                     | PERNSNFLRF                          | C-terminus Amidation                                    |                                                          |
|                                     | STLYKNFARL                          | C-terminus Amidation                                    |                                                          |
|                                     | VLGDKSDQFIRF                        | C-terminus Amidation                                    |                                                          |
| <u>IDL-like (IDL)</u>               |                                     |                                                         | $F_{2,9} = 0.890, P = 0.44$                              |
|                                     | AMAPHPLLLVSV                        | C-terminus Amidation                                    |                                                          |
|                                     | IDLSRLYGHL                          |                                                         |                                                          |
|                                     | IDLSRLYGHL                          |                                                         |                                                          |
|                                     | IDLSRLYGHLSS                        | C-terminus Amidation                                    |                                                          |
|                                     | IPHAVMAIDLRLYGHL                    | C-terminus Amidation                                    |                                                          |
|                                     | IPHAVMAIDLRLYGHL                    |                                                         |                                                          |
|                                     | IPHAVMAIDLRLYGHLSS                  |                                                         |                                                          |
|                                     | ISIQYLCDGAPDCSDGYDEDSRLCTAAKR       | N-terminus Acetylation                                  |                                                          |
|                                     | LKPLGGVDKVAIALSESQTIED              | N-terminus Acetylation                                  |                                                          |
| <u>Ion Transport Peptide (ITP)</u>  |                                     |                                                         | $F_{2,9} = 1.000, P = 0.405$                             |
|                                     | SPAQRMSPLLSHHLS                     |                                                         |                                                          |
| <u>Myosuppressin (MYO)</u>          |                                     |                                                         | $F_{2,9} = 3.611, P = 0.071$                             |
|                                     | AVAFIFVAMMASSNLSMASNLPLIYC          | Oxidation                                               |                                                          |
|                                     | DGLQKRQLCFALLERMDAPQEVSNVMDNQLYERGI |                                                         |                                                          |
|                                     | FVAMMASSNLSMASNL                    | Oxidation                                               |                                                          |
|                                     | FVAMMASSNLSMASNLPLI                 | N-terminus Acetylation; Oxidation; C-terminus Amidation |                                                          |
|                                     | LTVEDLVLMNQCTVYAVAFIFVAMMASSNLSMAS  | N-terminus Acetylation; Oxidation                       |                                                          |
|                                     | QDVDHVFLRF                          | N-Terminus Pyroglutamination; C-terminus Amidation      |                                                          |
|                                     | RQLCFALLERMDAPQEVSNV                | N-terminus Acetylation; Oxidation                       |                                                          |
|                                     | VLVMNQCTVYAVAFI                     | N-terminus Acetylation                                  |                                                          |
| <u>Myoinhibiting Peptide (MIP)</u>  |                                     |                                                         | $F_{2,9} = 1.652, P = 0.25$                              |
|                                     | AAIDVGSDPDIGIPKESDEMQM              | Oxidation; C-terminus Amidation                         |                                                          |
|                                     | AAIDVGSDPDIGIPKESDEMOME             | C-terminus Amidation                                    |                                                          |
|                                     | DPAWTNLKGIW                         | C-terminus Amidation                                    |                                                          |
|                                     | PEDEYAMKQLAT                        | N-terminus Acetylation                                  |                                                          |
|                                     | SAVLVIVGAIVCISMLPFSM                | Oxidation; C-terminus Amidation                         |                                                          |
|                                     | SEWGNFRGSW                          | C-terminus Amidation                                    |                                                          |
|                                     | VIVGAIVCISMLPFSMQAAIDVGSDPDIGIPKE   | N-terminus Acetylation                                  |                                                          |
| <u>Neuropeptide-like 1 (NPLP-1)</u> |                                     |                                                         | ↑ - Actively Parenting<br>$F_{2,9} = 8.615, P = 0.0081$  |
|                                     | AGCLLLEAYGDSIAPE                    |                                                         |                                                          |
|                                     | AGYIRTLPEEDN                        | C-terminus Amidation                                    |                                                          |
|                                     | ANLAKNGQLPNYQNDA                    |                                                         |                                                          |
|                                     | ERDSGN                              |                                                         |                                                          |
|                                     | FLLQPAVDRILLQRVLMQPR                | Oxidation                                               |                                                          |
|                                     | FLLQPAVDRILLQRVLMQPRN               |                                                         |                                                          |



Table 1. Continued

|                                                              |                                                         |                               |
|--------------------------------------------------------------|---------------------------------------------------------|-------------------------------|
| FLLQPAVDRILLQRVLMQPRNH                                       |                                                         |                               |
| GIESLARNGEL                                                  |                                                         |                               |
| GIESLARNGELH                                                 |                                                         |                               |
| GIESLARNGELHN                                                |                                                         |                               |
| GIESLARNGELHNKREIEDLI                                        | C-terminus Amidation                                    |                               |
| GIESLARNGELHNKREIEDLIDELY                                    | C-terminus Amidation                                    |                               |
| GIESLARNGELHNKREIEDLIDELYE                                   | C-terminus Amidation                                    |                               |
| GKRSIANLAKNGQLPNYQNDAEKRGIESLARNGELHN                        |                                                         |                               |
| HGPNDRSYDDMMKSDAERDSGNG                                      | N-terminus Acetylation                                  |                               |
| KESYDDDDYRMAAF                                               | C-terminus Amidation                                    |                               |
| LLLRSAPAESIRGTSALWPDSAGCLLE                                  | N-terminus Acetylation; C-terminus Amidation            |                               |
| NIANLARSYSFPY                                                | C-terminus Amidation                                    |                               |
| NLAALARAGYIRTLPEDEDN                                         | C-terminus Amidation                                    |                               |
| NLAALARAGYIRTLPEDEDNG                                        | C-terminus Amidation                                    |                               |
| NLAALARAGYIRTLPEDEDNGKRSIANLAK                               | C-terminus Amidation                                    |                               |
| NLASIKAGYKQPF                                                |                                                         |                               |
| NVAALLRQDKIHGPNDRSYDDMMKSDAERDSGNGD                          | C-terminus Amidation                                    |                               |
| NVASLARGGNLly                                                | C-terminus Amidation                                    |                               |
| NVASLARGGNLlyGKRNVAAALLRQD                                   | N-terminus Acetylation; C-terminus Amidation            |                               |
| SIANLAKNGQLPNYQND                                            |                                                         |                               |
| SIANLAKNGQLPNYQNDA                                           | C-terminus Amidation                                    |                               |
| SIANLAKNGQLPNYQNDAE                                          | C-terminus Amidation                                    |                               |
| VDEMNNKKESYDDDDYRMAAF                                        | N-terminus Acetylation; C-terminus Amidation            |                               |
| YDDMMKSDAERDSGNGD                                            | N-terminus Acetylation                                  |                               |
| YIGSLARSGELNRF                                               |                                                         |                               |
| YIGSLARSGELNRFHND                                            | C-terminus Amidation                                    |                               |
| <b>Pheromone Biosynthesis Activating Neuropeptide (PBAN)</b> |                                                         | <b>↑ - Actively Parenting</b> |
| AQLENYDKAITIYQDVAMSSLESSLLKYSACE                             |                                                         | $F_{2,9} = 5.377, P = 0.029$  |
| HNKMNFTPRL                                                   | C-terminus Amidation                                    |                               |
| KMSALWFGPRL                                                  | C-terminus Amidation                                    |                               |
| NPSSDELLKNTNLDREQLVALLEMLQESPWAVVALNE                        | C-terminus Amidation                                    |                               |
| TMAAKHHQSIAMYES                                              | N-terminus Acetylation; Oxidation; C-terminus Amidation |                               |
| <b>RYamide (RYa)</b>                                         |                                                         | $F_{2,9} = 4.033, P = 0.056$  |
| ADKAAKTAGKHVIVAPR                                            |                                                         |                               |
| ADKAAKTAGKHVIVAPRNDKFFLASRY                                  | C-terminus Amidation                                    |                               |
| ALTNRSQYN                                                    |                                                         |                               |
| ANDRPFMMGMRY                                                 | C-terminus Amidation                                    |                               |
| ASRYGKRSGGEMISNAAQAALVFPVPP                                  | Oxidation                                               |                               |
| DAMKPSELQDHLRRCHP                                            | N-terminus Acetylation; Oxidation; C-terminus Amidation |                               |
| GGAAHQAVQLITRGMANSDDTTESEDGIRRCW                             | Oxidation; C-terminus Amidation                         |                               |
| LNAVLEFYIGTVEA                                               | C-terminus Amidation                                    |                               |
| MKPSEL                                                       | C-terminus Amidation                                    |                               |
| MMTDAMSESKKKCRQY                                             | N-terminus Acetylation; Oxidation                       |                               |
| NDKFFLASRY                                                   | C-terminus Amidation                                    |                               |

Table 1. Continued

|                                    |                                            |                                                         |                                                         |
|------------------------------------|--------------------------------------------|---------------------------------------------------------|---------------------------------------------------------|
| <u>Tackykinin (TK)</u>             |                                            |                                                         | ↑ - Actively Parenting<br>$F_{2,9} = 5.882, P = 0.023$  |
|                                    | APNGFFGMR                                  | Oxidation; C-terminus Amidation                         |                                                         |
|                                    | DLETVLLPEES                                |                                                         |                                                         |
|                                    | ESKRAPNGFFGMR                              | C-terminus Amidation                                    |                                                         |
|                                    | PSGFTGVRGKKSFEDEDFEMR                      | N-terminus Acetylation; Oxidation                       |                                                         |
|                                    | PSRSAGFFGMR                                | C-terminus Amidation                                    |                                                         |
|                                    | SFEDEDFEMRDIED                             |                                                         |                                                         |
|                                    | YPYEFRGKFVGV                               |                                                         |                                                         |
|                                    | YPYEFRGKFVGV                               | C-terminus Amidation                                    |                                                         |
| <u>Short Neuropeptide F (sNPF)</u> |                                            |                                                         | $F_{2,9} = 2.074, P = 0.18$                             |
|                                    | LRFGRRSDPSLIQASPYMLSAQAQDAAE               |                                                         |                                                         |
|                                    | SDPSLIQASPYMLSAQAQDAAEIAN                  | C-terminus Amidation                                    |                                                         |
| <u>SIFamide (SIFa)</u>             |                                            |                                                         | $F_{2,9} = 0.297, P = 0.75$                             |
|                                    | SAMCEI                                     | N-terminus Acetylation; Oxidation; C-terminus Amidation |                                                         |
|                                    | TYRKPPFNGSIF                               | C-terminus Amidation                                    |                                                         |
| <u>Sulfakinin (SK)</u>             |                                            |                                                         | ↑ - Actively Parenting<br>$F_{2,9} = 8.756, P = 0.0077$ |
|                                    | EDFDDYGHLRY                                | C-terminus Amidation                                    |                                                         |
|                                    | GPAGASVPTEANRRI                            |                                                         |                                                         |
|                                    | MKLLLVMCLILMACNDGASAGPAGASVPTEANRRIRS      | Oxidation                                               |                                                         |
|                                    | QNSDDYGHLRF                                | N-Terminus Pyroglutamination; C-terminus Amidation      |                                                         |
|                                    | QTYFMMKLLLVMCLILMACNDGASAGPAGASVPTEANRRIRS | Oxidation                                               |                                                         |

Table 2. Principal Component Analysis (PCA) of neuropeptide abundance of virgins, actively parenting and post-parenting *Microphorus vespilloides* females. PC's with eigenvalues exceeding 1 are reported.

|                      | Principal Component |        |        |        |        |
|----------------------|---------------------|--------|--------|--------|--------|
|                      | PC1                 | PC2    | PC3    | PC4    | PC5    |
| Neuropeptides        |                     |        |        |        |        |
| NPLP-1               | -0.325              | 0.184  | -0.001 | 0.052  | -0.009 |
| TK                   | -0.330              | 0.057  | -0.208 | -0.138 | 0.220  |
| <i>Apis</i> NVP-like | -0.271              | -0.174 | -0.208 | -0.230 | 0.149  |
| DH <sub>31</sub>     | -0.185              | -0.086 | -0.287 | 0.442  | -0.376 |
| FMRFa                | -0.284              | -0.186 | 0.261  | 0.292  | -0.011 |
| ITG                  | -0.246              | 0.268  | 0.148  | 0.164  | -0.363 |
| SIFa                 | -0.097              | 0.457  | -0.100 | -0.200 | -0.156 |
| IDL-like             | -0.232              | 0.287  | -0.240 | -0.093 | -0.024 |
| SK                   | -0.281              | 0.144  | 0.385  | -0.029 | 0.181  |
| MYO                  | -0.261              | 0.216  | 0.362  | 0.150  | 0.246  |
| MIP                  | -0.177              | -0.348 | 0.151  | -0.356 | -0.156 |
| RYa                  | -0.186              | -0.368 | 0.298  | 0.224  | -0.034 |
| PBAN                 | -0.297              | -0.234 | -0.107 | 0.035  | 0.093  |
| ITP                  | 0.042               | -0.218 | 0.270  | -0.472 | -0.346 |
| sNPF                 | -0.209              | -0.181 | -0.306 | 0.045  | -0.419 |
| DH <sub>47</sub>     | -0.211              | -0.225 | -0.315 | -0.082 | 0.418  |
| CCAP                 | 0.286               | -0.136 | -0.079 | 0.369  | 0.184  |
| Eigenvalues          | 6.679               | 3.497  | 1.896  | 1.612  | 1.401  |
| % Variance Explained | 39.28               | 20.57  | 11.15  | 9.48   | 8.24   |
